# Supplementary material
Source: PubMed Central journal article supplement (PMC4236242)
Supplement: NIHMS623590-supplement-supplement_1.pdf [file NIHMS623590-supplement-supplement_1.pdf]

**Supplemental Table 1. Association of Sleep Curtailment Score with Markers of Cardio-Metabolic Health ( $n = 652$ )<sup>†</sup>**

<sup>1</sup> All analyses use linear regression other than IL6 and CRP. Model 1 is adjusted only for child age and sex. Model 2 is additionally adjusted for maternal education, pre-pregnancy BMI, age at enrollment and nullparity; household income; and child race/ethnicity. Model 3 is further adjusted for child BMI z-score at mid-childhood.

<sup>2</sup> IL6 and CRP were log-transformed outcomes to achieve normality of residuals, then back-transformed (exponentiated) for interpretability.

<sup>†</sup> The range of the total sleep score is 0-13, where 0 indicates the maximal sleep curtailment and 13 indicates never having curtailed sleep.

**Supplemental Table 1. Association of Sleep Curtailment Score with Markers of Cardio-Metabolic Health (*n* = 652)†**

| <u>Sleep Curtailment Score</u>         | <b>0 to 4</b><br><i>5.1%</i>                     | <b>5 to 7</b><br><i>13.9%</i> | <b>8 to 9</b><br><i>14.1%</i> | <b>10 to 11</b><br><i>28.7%</i> | <b>12 to 13</b><br><i>38.30%</i> | <i>Continuous Score</i>      |
|----------------------------------------|--------------------------------------------------|-------------------------------|-------------------------------|---------------------------------|----------------------------------|------------------------------|
| <i>Cardio-Metabolic Markers</i>        |                                                  |                               |                               |                                 |                                  |                              |
| <b>Fasting insulin, uU/mL</b>          | <b>Mean Difference (95% Confidence Interval)</b> |                               |                               |                                 |                                  |                              |
| Model 1. Child age & sex               | <b>3.19 (0.74, 5.64)</b>                         | <b>1.61 (0.04, 3.17)</b>      | 1.28 (-0.30, 2.87)            | 0.74 (-0.45, 1.94)              | 0.0 (ref)                        | <b>-0.32 (-0.49, -0.14)</b>  |
| Model 2. Model 1 + SES                 | 1.98 (-0.64, 4.60)                               | 0.97 (-0.72, 2.66)            | 0.63 (-0.98, 2.23)            | 0.51 (-0.67, 1.69)              | 0.0 (ref)                        | <b>-0.21 (-0.41, -0.003)</b> |
| Model 3. Model 2 + BMI                 | 0.77 (-1.66, 3.19)                               | 0.31 (-1.30, 1.93)            | 0.16 (-1.34, 1.66)            | 0.30 (-0.81, 1.41)              | 0.0 (ref)                        | -0.08 (-0.27, 0.11)          |
| <b>Fasting glucose, mg/dL</b>          |                                                  |                               |                               |                                 |                                  |                              |
| Model 1. Child age & sex               | 3.96 (-2.71, 10.63)                              | 3.19 (-0.71, 7.09)            | 3.94 (-0.06, 7.95)            | 2.62 (-0.60, 5.84)              | 0.0 (ref)                        | <b>-0.52 (-0.99, -0.06)</b>  |
| Model 2. Model 1 + SES                 | 3.16 (-4.01, 10.32)                              | 3.00 (-1.25, 7.24)            | 4.07 (-0.09, 8.24)            | 2.62 (-0.61, 5.85)              | 0.0 (ref)                        | -0.49 (-1.02, 0.04)          |
| Model 3. Model 2 + BMI                 | 2.72 (-4.45, 9.89)                               | 2.76 (-1.50, 7.02)            | 3.90 (-0.26, 8.07)            | 2.55 (-0.66, 5.76)              | 0.0 (ref)                        | -0.45 (-0.98, 0.09)          |
| <b>Total cholesterol, mg/dL</b>        |                                                  |                               |                               |                                 |                                  |                              |
| Model 1. Child age & sex               | -0.41 (-12.30, 11.47)                            | -0.27 (-8.09, 7.56)           | 0.22 (-7.65, 8.10)            | -1.02 (-6.76, 4.73)             | 0.0 (ref)                        | 0.04 (-0.83, 0.90)           |
| Model 2. Model 1 + SES                 | 0.75 (-11.86, 13.35)                             | 0.56 (-7.89, 9.02)            | 1.08 (-7.11, 9.28)            | -0.95 (-6.73, 4.83)             | 0.0 (ref)                        | -0.09 (-1.09, 0.91)          |
| Model 3. Model 2 + BMI                 | -0.14 (-12.81, 12.52)                            | 0.08 (-8.42, 8.57)            | 0.74 (-7.51, 8.99)            | -1.10 (-6.89, 4.69)             | 0.0 (ref)                        | 0.00 (-1.01, 1.02)           |
| <b>Diastolic blood pressure, mm/Hg</b> |                                                  |                               |                               |                                 |                                  |                              |
| Model 1. Child age & sex               | -0.37 (-2.77, 2.03)                              | -0.24 (-1.77, 1.28)           | -0.74 (-2.22, 0.75)           | -0.75 (-1.93, 0.43)             | 0.0 (ref)                        | 0.04 (-0.13, 0.20)           |
| Model 2. Model 1 + SES                 | -0.57 (-3.04, 1.90)                              | -0.47 (-2.06, 1.12)           | -1.29 (-2.79, 0.21)           | -0.95 (-2.12, 0.22)             | 0.0 (ref)                        | 0.07 (-0.11, 0.26)           |
| Model 3. Model 2 + BMI                 | -0.70 (-3.19, 1.78)                              | -0.54 (-2.14, 1.06)           | -1.34 (-2.85, 0.17)           | -0.97 (-2.14, 0.19)             | 0.0 (ref)                        | 0.08 (-0.10, 0.27)           |
| <b>Adiponectin, ug/mL</b>              |                                                  |                               |                               |                                 |                                  |                              |
| Model 1. Child age & sex               | -1.14 (-4.94, 2.67)                              | -1.33 (-3.69, 1.02)           | 0.03 (-2.43, 2.50)            | -0.72 (-2.65, 1.22)             | 0.0 (ref)                        | 0.12 (-0.14, 0.38)           |
| Model 2. Model 1 + SES                 | -0.83 (-4.96, 3.30)                              | -1.01 (-3.50, 1.49)           | 0.48 (-2.13, 3.10)            | -0.56 (-2.50, 1.38)             | 0.0 (ref)                        | 0.07 (-0.23, 0.38)           |
| Model 3. Model 2 + BMI                 | -0.37 (-4.51, 3.77)                              | -0.76 (-3.26, 1.74)           | 0.66 (-1.96, 3.28)            | -0.48 (-2.41, 1.44)             | 0.0 (ref)                        | 0.03 (-0.28, 0.33)           |
| <b>TNF-<math>\alpha</math>, pg/mL</b>  |                                                  |                               |                               |                                 |                                  |                              |
| Model 1. Child age & sex               | -3 (-259, 253)                                   | 9 (-146, 165)                 | -91 (-248, 66)                | -38 (-162, 85)                  | 0.0 (ref)                        | 2 (-16, 20)                  |
| Model 2. Model 1 + SES                 | 106 (-169, 380)                                  | 87 (-81, 254)                 | -44 (-207, 119)               | -21 (-145, 104)                 | 0.0 (ref)                        | -10 (-301, 11)               |
| Model 3. Model 2 + BMI                 | 72 (-205, 349)                                   | 69 (-99, 236)                 | -57 (-220, 106)               | -26 (-150, 98)                  | 0.0 (ref)                        | -7 (-27, 14)                 |
| <b>IL6, pg/mL</b>                      | <b>Relative change (95% CI)<sup>2</sup></b>      |                               |                               |                                 |                                  | <i>Continuous Score</i>      |
| Model 1. Child age & sex               | 1.37 (0.96, 1.95)                                | 1.07 (0.85, 1.34)             | 0.94 (0.74, 1.19)             | 0.95 (0.80, 1.14)               | 1.0 (ref)                        | 0.98 (0.96, 1.01)            |
| Model 2. Model 1 + SES                 | 1.30 (0.89, 1.88)                                | 1.04 (0.82, 1.33)             | 0.90 (0.71, 1.15)             | 0.94 (0.79, 1.12)               | 1.0 (ref)                        | 0.99 (0.96, 1.02)            |
| Model 3. Model 2 + BMI                 | 1.27 (0.87, 1.84)                                | 1.03 (0.81, 1.32)             | 0.90 (0.70, 1.15)             | 0.94 (0.78, 1.12)               | 1.0 (ref)                        | 0.99 (0.96, 1.02)            |
| <b>hsCRP, mg/L</b>                     |                                                  |                               |                               |                                 |                                  |                              |
| Model 1. Child age & sex               | 2.43 (1.22, 4.82)                                | 1.55 (0.99, 2.43)             | 1.53 (0.96, 2.44)             | 1.40 (1.00, 1.95)               | 1.0 (ref)                        | <b>0.92 (0.87, 0.96)</b>     |

**Supplemental Table 1. Association of Sleep Curtailment Score with Markers of Cardio-Metabolic Health (*n* = 652)†**

| <u>Sleep Curtailment Score</u> | <b>0 to 4</b><br><i>5.1%</i> | <b>5 to 7</b><br><i>13.9%</i> | <b>8 to 9</b><br><i>14.1%</i> | <b>10 to 11</b><br><i>28.7%</i> | <b>12 to 13</b><br><i>38.30%</i> | <b><i>Continuous Score</i></b> |
|--------------------------------|------------------------------|-------------------------------|-------------------------------|---------------------------------|----------------------------------|--------------------------------|
| Model 2. Model 1 + SES         | 1.82 (0.88, 3.74)            | 1.28 (0.80, 2.04)             | 1.23 (0.76, 1.99)             | 1.29 (0.92, 1.80)               | 1.0 (ref)                        | 0.95 (0.89, 1.00)              |
| Model 3. Model 2 + BMI         | 1.33 (0.66, 2.70)            | 1.08 (0.69, 1.68)             | 1.09 (0.69, 1.72)             | 1.22 (0.89, 1.69)               | 1.0 (ref)                        | 0.98 (0.92, 1.03)              |

<sup>1</sup> All analyses use linear regression other than IL6 and CRP. Model 1 is adjusted only for child age and sex. Model 2 is additionally adjusted for maternal education, pre-pregnancy BMI, age at enrollment and nullparity; household income; and child race/ethnicity. Model 3 is further adjusted for child BMI z-score at mid-childhood.

<sup>2</sup> IL6 and CRP were log-transformed outcomes to achieve normality of residuals, then back-transformed (exponentiated) for interpretability.

† The range of the total sleep score is 0-13, where 0 indicates the maximal sleep curtailment and 13 indicates never having curtailed sleep.
